# Supplementary material
Source: Springer Nature journal article supplement (https://www.springermedizin.de/resource/supplementary/12889_2007_1094_MOESM1_ESM.pdf/9502444)
Supplement: MOESM1 [file 9502444]

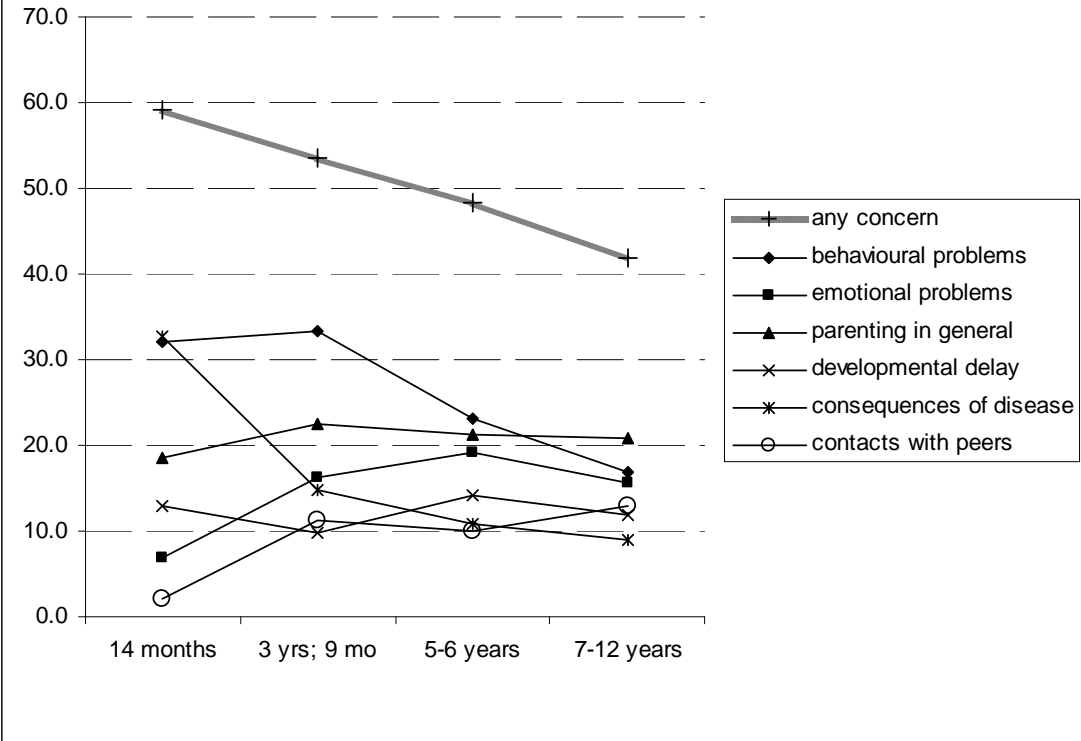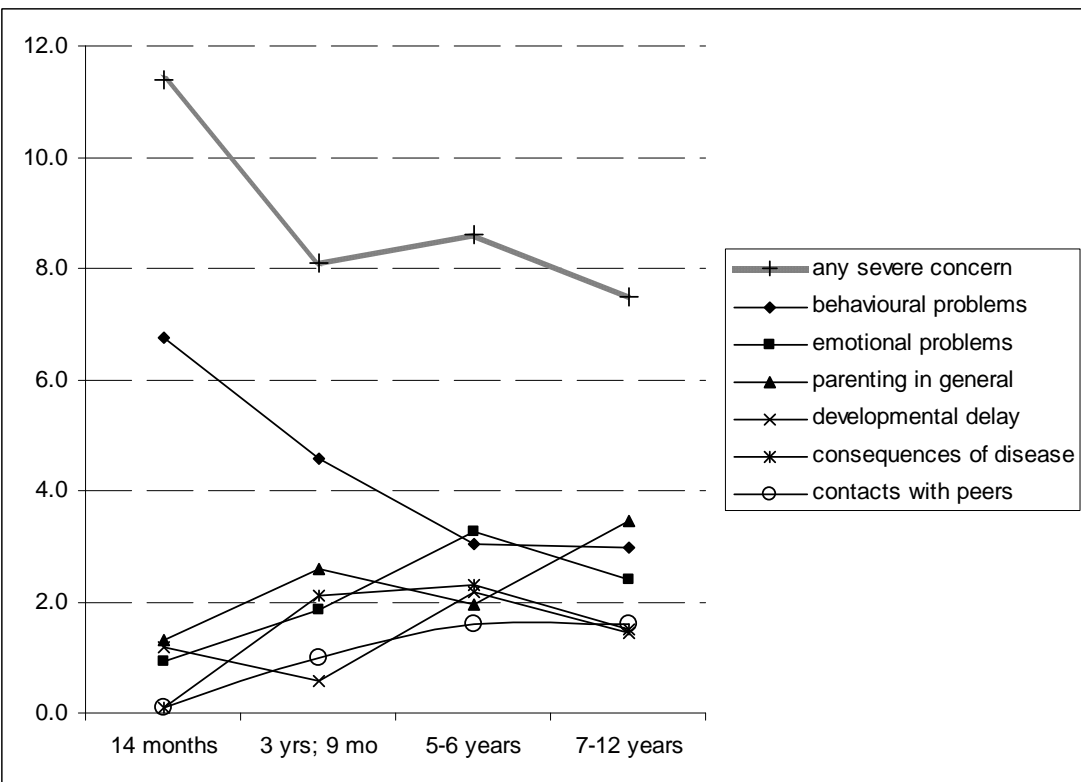

# In these Figures, lines are employed to improve their readability but it should be stressed that all measurements were cross-sectional and not longitudinal
